# Supplementary material for: Genomic Evidence for Phototrophic Oxidation of Small Alkanes in a Member of the Chloroflexi Phylum
Source: bioRxiv or medRxiv preprint supplement (doi:10.1101/531582), 2019-09-21

Tree scale: 1

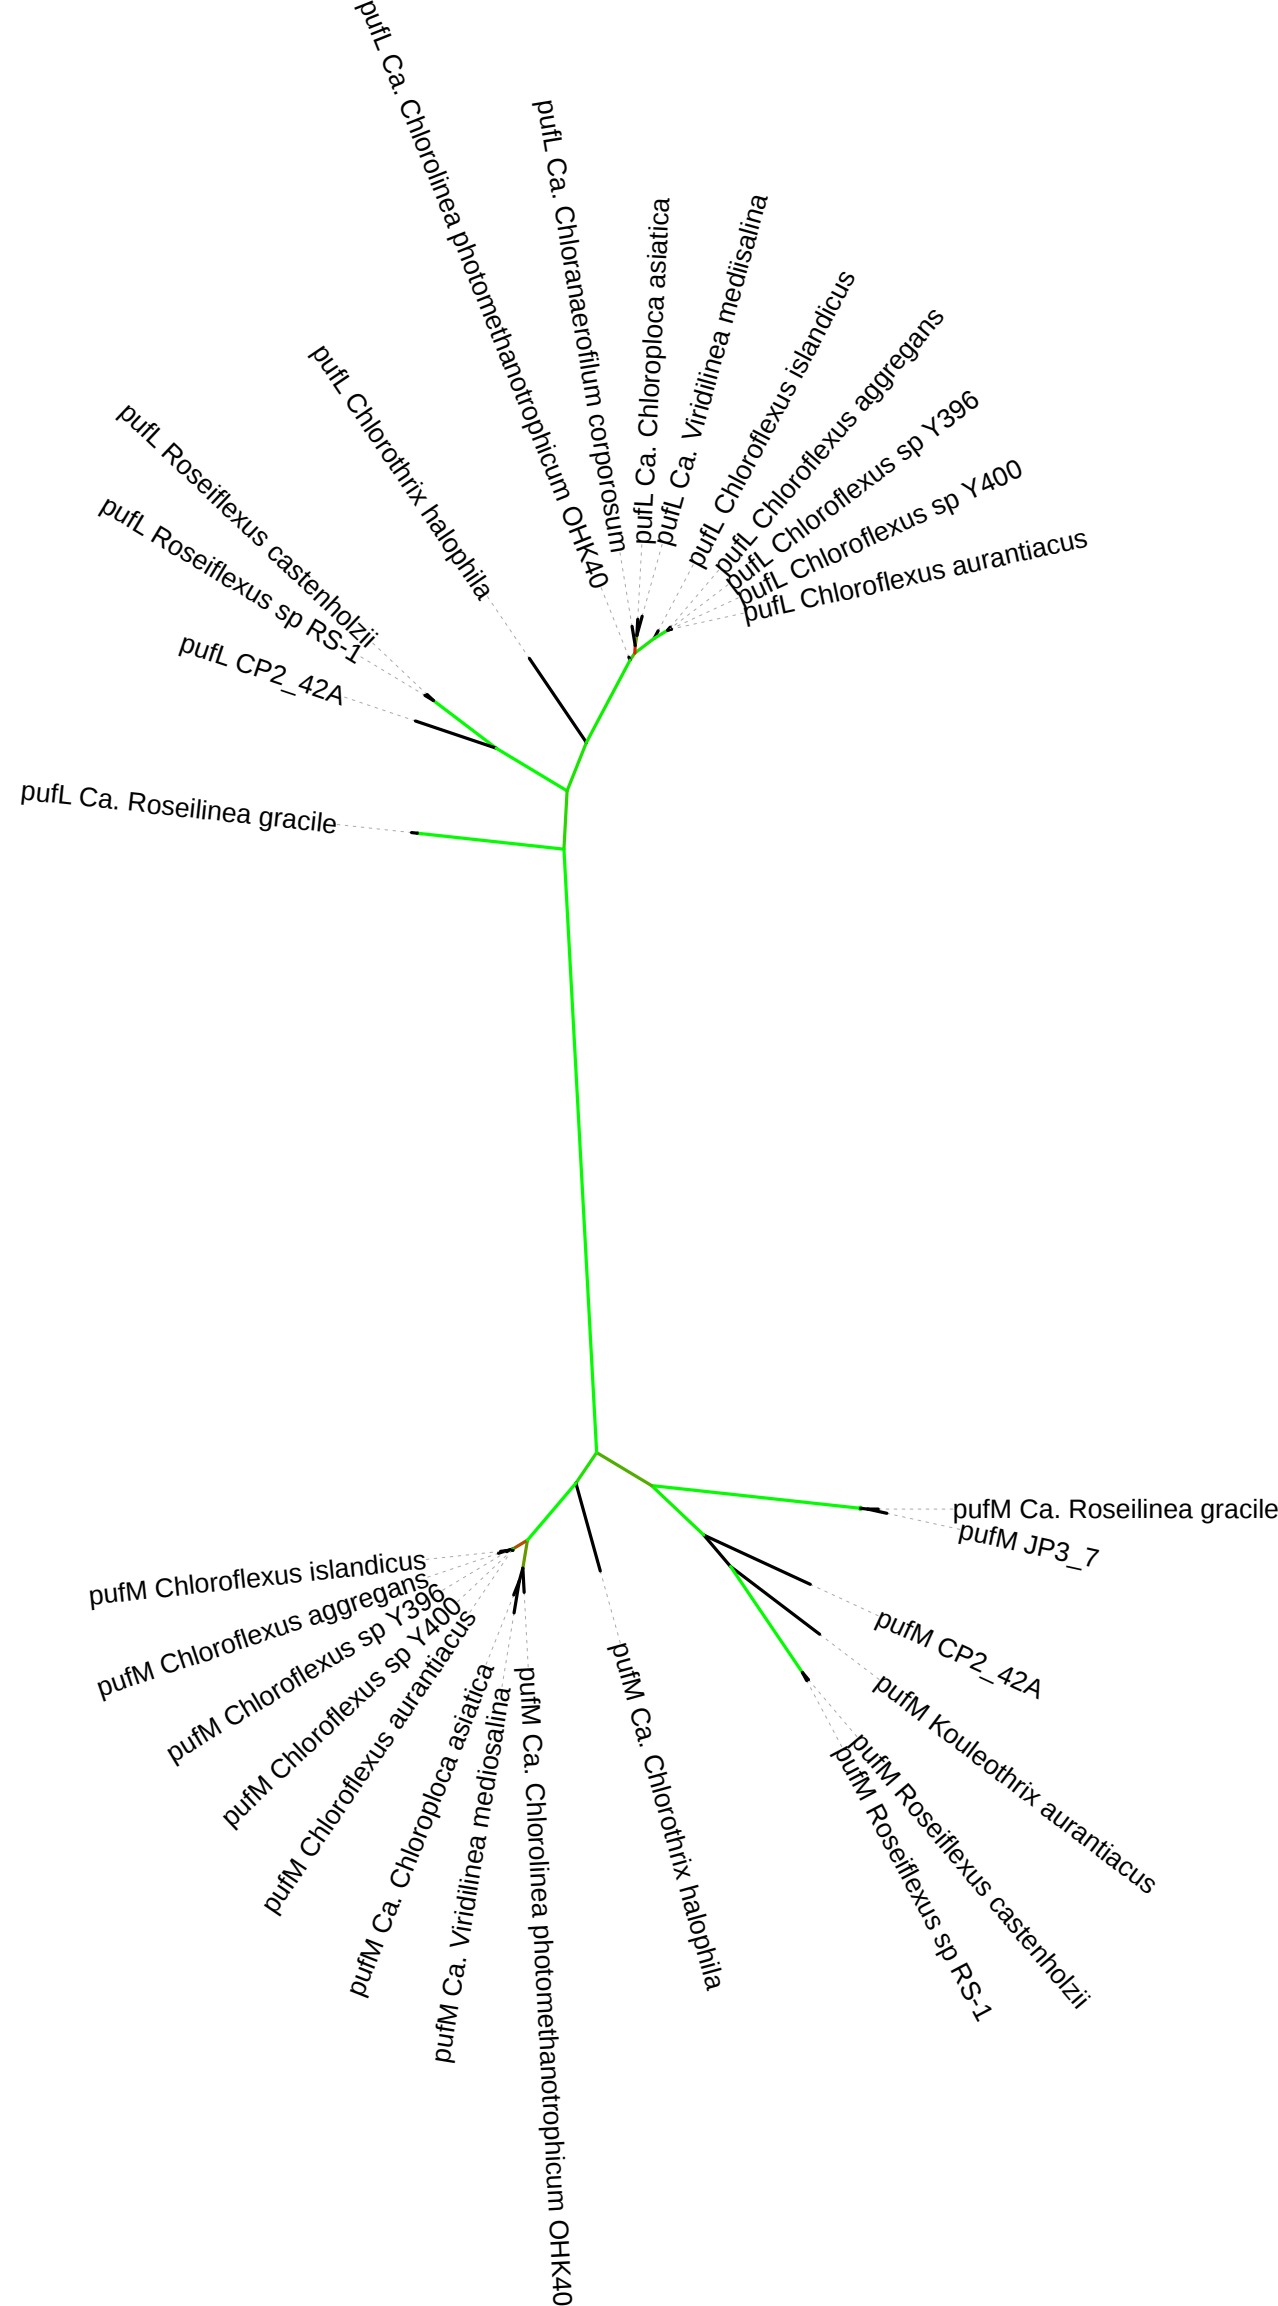

Supplement: Supplementary file [file media-4.pdf]
